# Supplementary material
Source: PubMed Central journal article supplement (PMC5214535)
Supplement: jciinsight-2-89760-s001.pdf [file jciinsight-2-89760-s001.pdf]

A

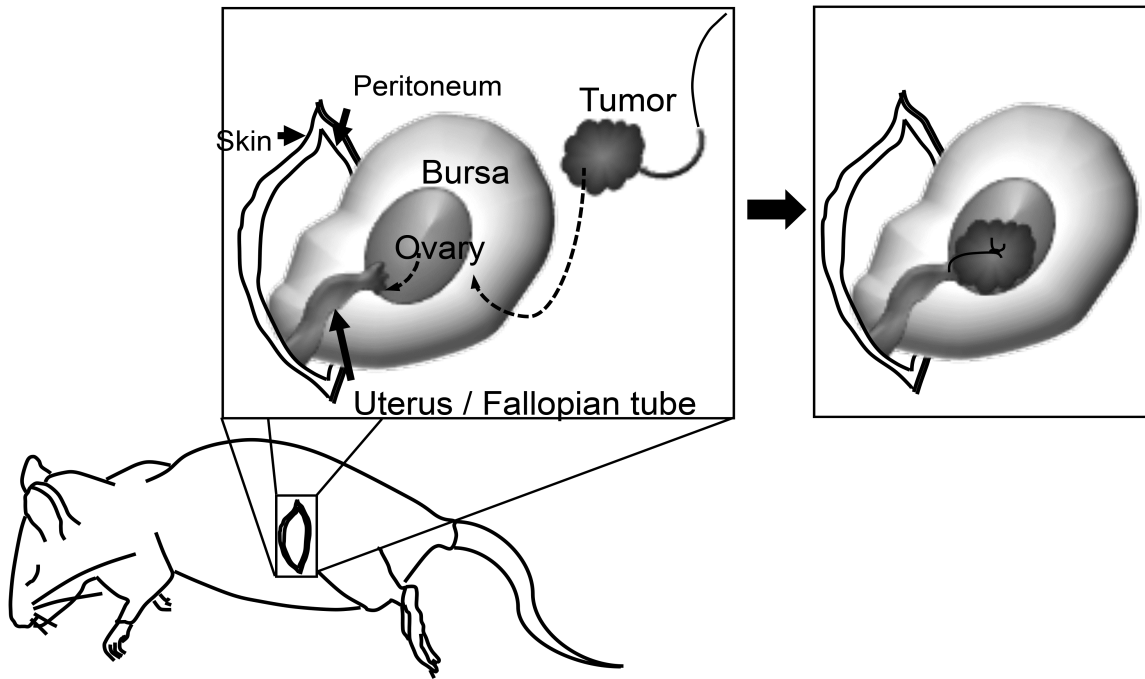

B

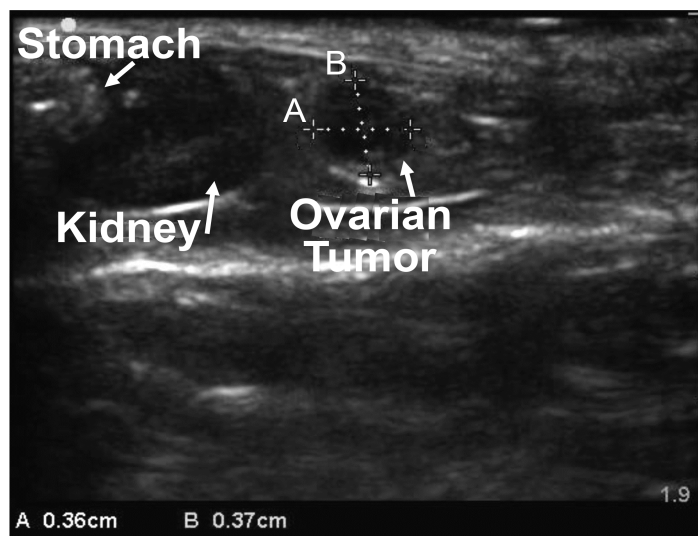

**Supplemental Figure 1. Orthotopic ovarian patient derived xenograft (PDX) Model: transplant procedure and tumor evaluation.** (A) Diagram showing surgical tumor transplantation to mouse ovary. Under anesthesia, a small 1-2cm vertical incision is made through the skin over the left flank. The skin is undermined and the peritoneal cavity is then opened and a 1cm vertical incision is created. The left ovary, ovarian bursa and uterine horn are elevated and exteriorized. Once the left ovary is identified on the anterior side of the bursa, two to three tumor chunks (~2x2x2mm each) are sutured to the ovary/fallopian tube fimbria using 5.0 PDS suture. The tumor transplant is then internalized back into the peritoneal cavity, and ~50 $\mu$ L of matrigel is placed over the transplant. The peritoneal cavity is closed and the skin is re-approximated using dermabond (skin glue). (B) PDX tumor volume measurements by ultrasound are shown. Representative ultrasound image obtained with the SonoSite M-TURBO ultrasound using a HFL38x 13-6MHz linear transducer. Sagittal view highlighting landmark anatomy (stomach and kidney). Ovarian tumor length ( $l$ ) and width ( $w$ , smaller of two measurements) is illustrated (B and A, respectively). Tumor volume was calculated using the following equation:  $V=l*w^2/2$ .

|        |
|--------|
| ABL1   |
| AKT1   |
| AKT2   |
| AKT3   |
| ALK    |
| APC    |
| ARAF   |
| ARID1A |
| ARL11  |
| ATM    |
| ATR    |
| AURKA  |
| BAP1   |
| BARD1  |
| BLM    |
| BRAF   |
| BRCA1  |
| BRCA2  |
| BRIP1  |
| CBX2   |
| CCND1  |
| CCND2  |
| CCND3  |
| CCNE1  |
| CDH1   |
| CDK12  |
| CDK4   |
| CDK6   |
| CDKN1A |
| CDKN1B |
| CDKN1C |
| CDKN2A |
| CDKN2B |

|              |
|--------------|
| CEBPA        |
| CHEK1        |
| CHEK2        |
| RP3-510D11.2 |
| RP11-554I8.2 |
| CREBBP       |
| CRKL         |
| CSF1R        |
| CTNNB1       |
| DAB2         |
| DDR2         |
| DICER1       |
| DIRAS3       |
| DLEC1        |
| DPH1         |
| EGFR         |
| EIF5A2       |
| EME1         |
| EPHA3        |
| ERBB2        |
| ERBB3        |
| ERBB4        |
| ERCC3        |
| ESR1         |
| FANCA        |
| FANCE        |
| FANCM        |
| FBXW7        |
| FGF1         |
| FGFR1        |
| FGFR2        |
| FGFR3        |
| FLT3         |

|        |
|--------|
| FOXL2  |
| FRS2   |
| GNA11  |
| GNAQ   |
| GNAS   |
| HRAS   |
| IGF1R  |
| JAK1   |
| JAK2   |
| JAK3   |
| JARID2 |
| KDR    |
| KIT    |
| KMT2C  |
| KRAS   |
| MAP2K1 |
| MAP2K2 |
| MAP2K4 |
| MAP3K4 |
| MAPK1  |
| MAPK3  |
| MECOM  |
| MET    |
| MLH1   |
| MPL    |
| MRE11A |
| MSH2   |
| MSH3   |
| MSH6   |
| MTOR   |
| MUS81  |
| MYC    |
| NBN    |

|         |
|---------|
| NF1     |
| NF2     |
| NOTCH1  |
| NOTCH2  |
| NOTCH3  |
| NRAS    |
| OPCML   |
| PALB2   |
| PAX8    |
| PDGFRA  |
| PEG3    |
| PIK3CA  |
| PIK3R1  |
| PLAGL1  |
| PMS2    |
| POLD1   |
| POLD2   |
| POLD3   |
| POLD4   |
| PPM1D   |
| PPP2R1A |
| PRKCI   |
| PTEN    |
| RAB25   |
| RAD50   |
| RAD51   |
| RAD51B  |
| RAD51C  |
| RAD51D  |
| RAD52   |
| RAD54B  |
| RAD54L  |
| RAF1    |

|         |
|---------|
| RASSF1  |
| RB1     |
| RPA1    |
| RPA2    |
| RPA3    |
| RPA4    |
| RPS6KA2 |
| RSF1    |
| SHFM1   |
| SMAD2   |
| SMAD4   |
| SMARCA4 |
| SMARCB1 |
| SPARC   |
| SRC     |
| SSBP1   |
| STK11   |
| TERT    |
| TOP3A   |
| TOP3B   |
| TP53    |
| TP53BP1 |
| WWOX    |
| XRCC2   |
| XRCC3   |

|               |
|---------------|
| Key:          |
| Whole Genes   |
| Exons + UTR's |

**Supplemental Figure 2. DNA targeted sequence ovarian cancer gene panel.** Custom capture panel including 157 genes, primarily genes targetable and involved in pathways implicated in ovarian and/or breast cancer susceptibility and tumorigenesis, such as HR, mismatch repair, or checkpoint inhibition. Whole genes were sequenced for the genes most frequently mutated (including *BRCA1* and *BRCA2*), while only exons and untranslated regions (UTR's) were analyzed in the remaining genes.

### Metastasis to Diaphragm

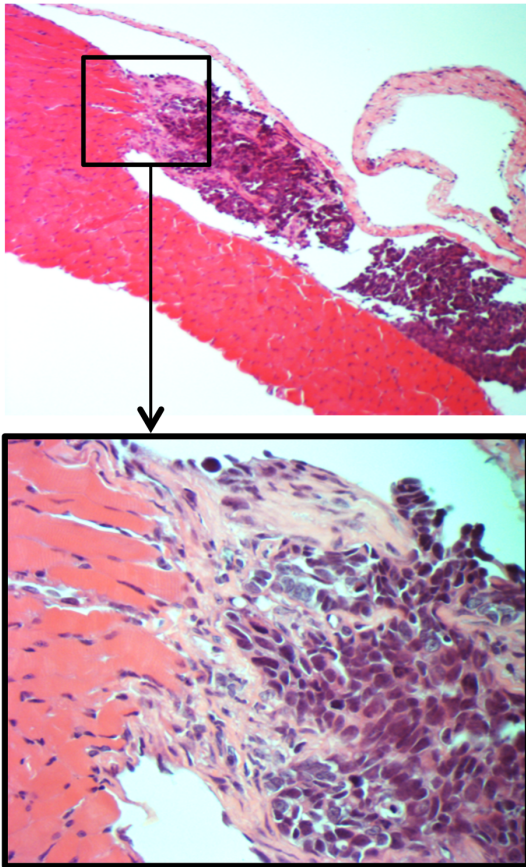

**Supplemental Figure 3. Histology of PDX metastatic tumor to diaphragm.** Metastatic tumor to diaphragm was obtained from a *BRCA2*<sup>MUT</sup> PDX (WO-2-3, mouse passage 3). Magnifications are 10x (upper image) and 40x (lower image). Insert shows tumors invading diaphragm.

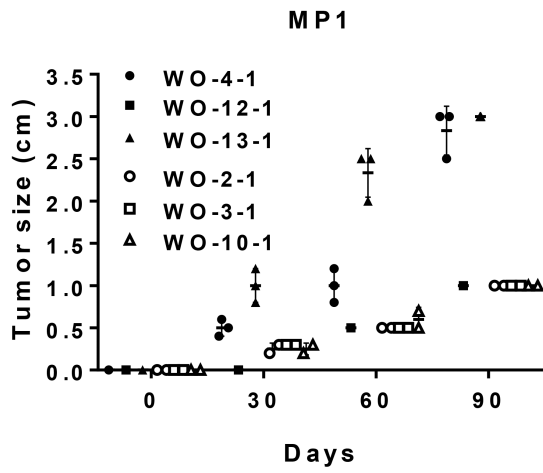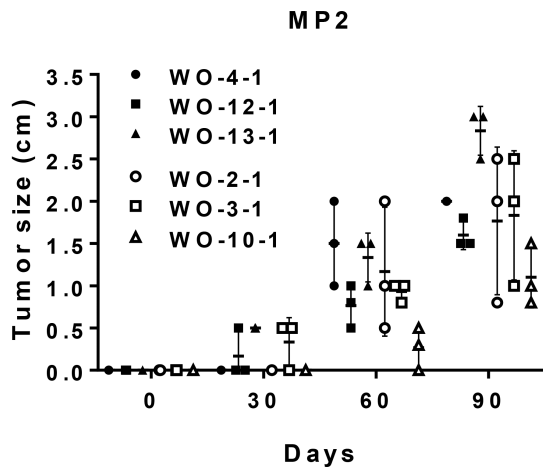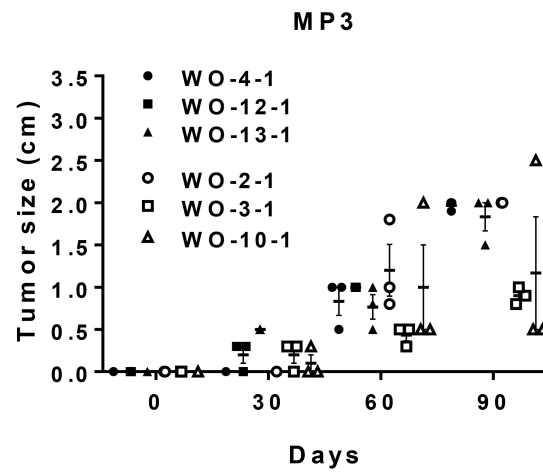

**Supplemental Figure 4.** PDX tumor size by palpation over time shown by dot plot for select PDX models comparing *BRCA*<sup>MUT</sup> (WO2-1, WO3-1, WO-10-1) to *BRCA*<sup>WT</sup> (WO-4-1, WO-12-1, WO-13-1) HGSOC over mouse passage 1 (MP1) to mouse passage 3 (MP3). The horizontal line is the mean of determinations with the SD. Each symbol represents tumor size of individual mouse. MP1; WO-4-1 (n=3), WO-12-1 (n=1), WO-13-1 (n=3), WO-2-1 (n=2), WO-3-1 (n=2), WO-10-1 (n=2), MP2 and MP3 ; n=3 each PDX.

| PDX           | PAX8 |     |     |     | CK7 |     |     |     | ER  |     |     |     | BRCA1 |     |     |     |
|---------------|------|-----|-----|-----|-----|-----|-----|-----|-----|-----|-----|-----|-------|-----|-----|-----|
|               | P    | MP1 | MP2 | MP3 | P   | MP1 | MP2 | MP3 | P   | MP1 | MP2 | MP3 | P     | MP1 | MP2 | MP3 |
| WO-2 (BRCA2)  | +++  | +++ | +++ | +++ | ++  | ++  | +   | ++  | +++ | +++ | +++ | +++ |       |     |     |     |
| WO-3 (BRCA1)  | +++  | +++ | +++ | +++ | ++  | ++  | +++ | +++ | +++ | +++ | +++ | +++ | +     | +   | -   | +   |
| WO-4 (WT)     | +++  | +++ | +++ | +++ | +++ | +++ | ×   | +++ | +++ | +++ | ++  | +++ | ×     | +++ | +   | ++  |
| WO-8 (BRCA1)  | +++  | +++ | +++ |     | ×   | ++  | ++  |     | ++  | +++ | +++ |     | ×     | +   | +   |     |
| WO-10 (BRCA1) | +++  | +++ | +++ | +++ | ++  | ++  | ++  | ++  | +++ | +++ | +++ | +++ | +     | -   | -   | -   |
| WO-13 (WT)    | +++  | +++ | +++ | +++ | +++ | +++ | +++ | +++ | -   | -   | -   | -   |       |     |     |     |
| WO-16 (BRCA1) | +++  | +++ | +++ |     | +++ | ++  | +++ |     | ++  | -   | ++  |     | ×     | -   | -   |     |
| WO-19 (WT)    | +    | ++  | ++  |     | +   | ++  | ++  |     | +++ | +++ | +++ |     | ++    | ++  | +++ |     |
| WO-20 (WT)    | +++  | +++ | +++ |     | +++ | +++ | +++ |     | -   | +   | -   |     | ×     | ++  | ++  |     |
| WO-21 (BRCA1) | ++   | +++ |     |     | +   | +   |     |     | ++  | +++ |     |     | +     | +   |     |     |
| WO-24 (WT)    | +++  | +++ |     |     | +++ | +++ |     |     | -   | -   |     |     |       |     |     |     |

- +++ strong nuclear (PAX8, ER, BRCA1) / cytoplasmic (CK7) staining
- ++ clear nuclear (PAX8, ER, BRCA1) / cytoplasmic (CK7) staining in multiple cells
- +
- none
- ×
- Not enough cells
- Not done

**Supplemental Figure 5. Summary of IHC findings in *BRCA*<sup>MUT</sup> and *BRCA*<sup>WT</sup> parent tumors and PDXs.** Parent (P) and PDX tumors mouse passage 1 (MP1) up to mouse passage 3 (MP3) were fixed, paraffin embedded, and stained for PAX8, CK7, ER, and BRCA1 proteins. Slides were assessed by a Gynecologic Oncology pathologist in a blinded manner using light microscopy and scored based on nuclear (PAX8, ER, BRCA1) or cytoplasmic (CK7) staining. Epithelial HGSOc markers, PAX8 and CK7, were positive in all patient tumors (n=11/11) and preserved over multiple mouse passages in all PDXs up to MP3. ER was expressed in 72.7% (n=8/11) of patient tumors (defined as >10% of nuclear staining). All *BRCA*<sup>MUT</sup> patient tumors (n=6/6) and 40% (n=2/5) *BRCA*<sup>WT</sup> patient tumors were ER+. ER status was preserved over MP1 to MP3 in 91% (n=10/11). IHC slides were evaluated from n=3 tumors for each model and representative staining is shown. Staining intensity was calculated by counting percentage of positive cells in 10 High power fields. +++ was defined as >50% positive; ++ was defined as 10-50% positive, + was defined as <10% and – was defined as no staining.



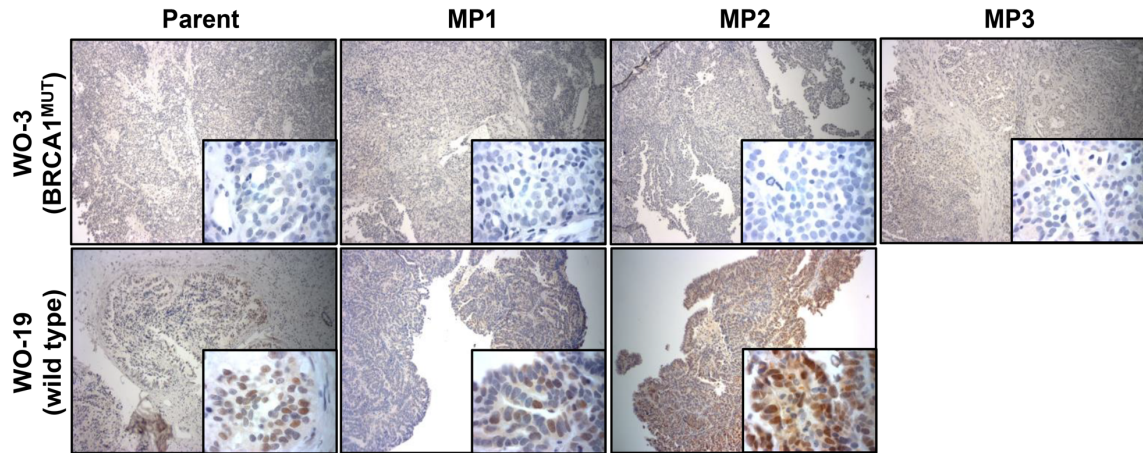

**Supplemental Figure 6. BRCA1 protein in parent tumor from BRCA germline and wild-type patient and matched PDXs.** Staining for BRCA1 protein in a  $BRCA1^{MUT}$  (WO-3-1) and  $BRCA^{WT}$  (WO-19-1) patient tumor is preserved in PDXs passaged up to mouse passage 3 (MP3). Magnifications are 10x (large box) and 100x (insert). IHC slides were evaluated from n=3 tumors for each model and representative staining is shown.

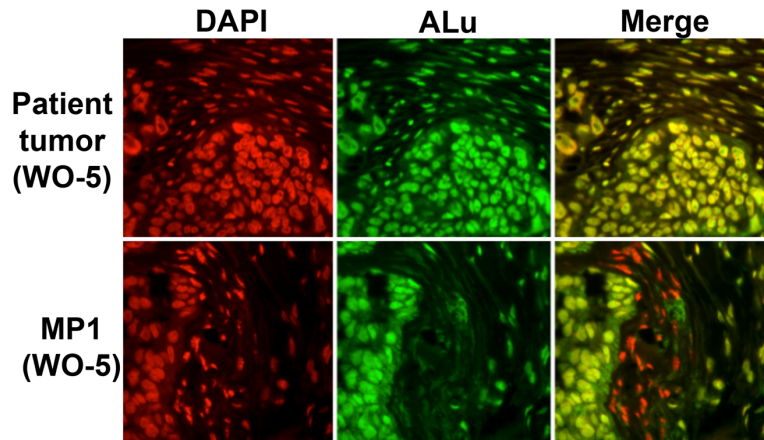

**Supplemental Figure 7. Human cells are present in the PDX stroma.** Human specific Alu staining confirmed human origin, and DAPI staining identified nuclei of a parent tumor and matched PDX MP1 tumor (red is DAPI, green nuclei is ALU, and right is merged image) Merged image represents co-localization of human cells present in the PDX stroma (WO-5) at an early mouse passage (MP-1). Magnification=40x. Staining was performed on at least 3 PDX tumors for each model and representative staining is shown.

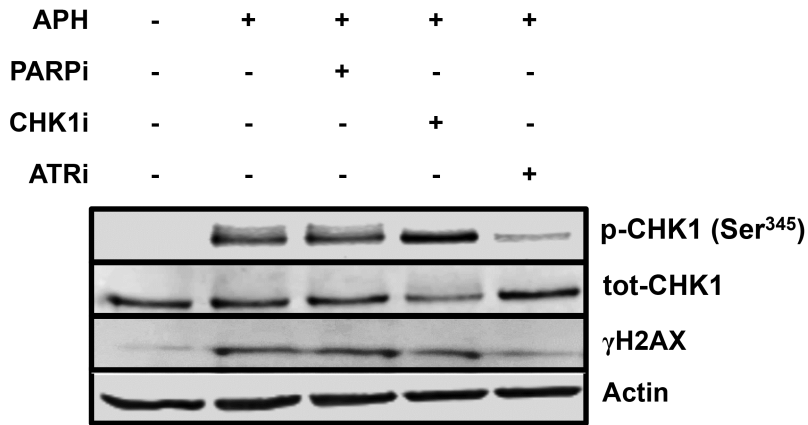

**Supplemental Figure 8. Targeting the ATR axis.** To exam direct effects of PARPi, CHK1i, and ATRi on ATR/CHK1 pathway, *BRCA2*<sup>MUT</sup> (PEO1) and *BRCA2*<sup>REV</sup> (PEO4) cells were treated with aphidicolin (APH) for 30 minutes prior to the addition of the indicated inhibitors (PARPi 1uM (AZD2281), CHK1i 1uM (MK8776), and ATRi 1uM (AZD6738)). Lysates were collected after 4h treatment. Western blot for the indicated total and phospho-proteins. Representative experiment of three independent experiments

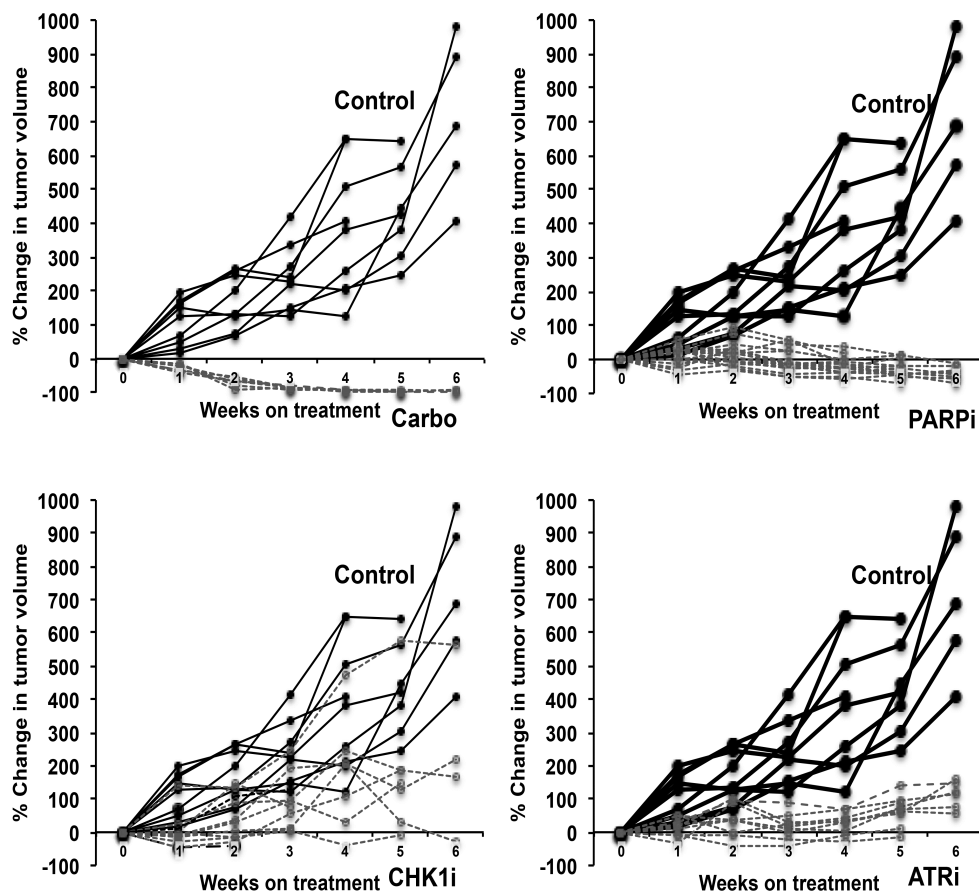

**Supplemental Figure 9. Individual PDX tumor volume change with carboplatin, PARPi, CHK1i, and ATRi monotherapy treatment.** The percent change in tumor volume from the starting tumor volume was plotted over treatment duration for individual PDXs. All mice in the carboplatin group after 6 weeks of treatment had complete remission (n=6/6). In the PARPi group 68.8% (n=11/16) and 31.2% (n=5/16) of mice showed a partial remission (PR) and stable disease (SD), respectively, by RECIST1.1. There were no complete responses with PARPi alone. In the CHK1i group 25% (n=2/8) had SD and 75% (n=6/8) had PD. In the ATRi group 22.2% (n=2/9) and 77.8% (n=7/9) of mice had SD and PD, respectively. Each dot represents measurement of individual mouse. Control, n=9; PARPi n=16; Carboplatin, n=6; ATRi, n=9; CHK1i, n=8.

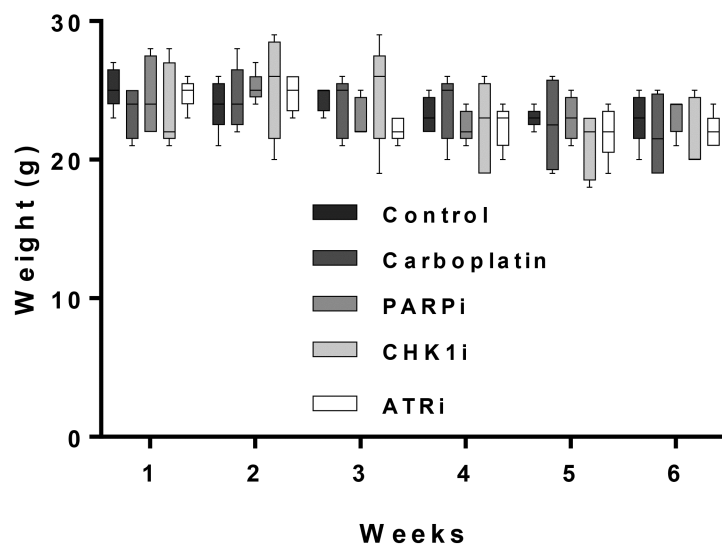

|                               |
|-------------------------------|
| Carboplatin 50mg/kg IP weekly |
| PARPi 100mg/kg PO daily       |
| CHK1i 50mg/kg IP 3x/wk        |
| ATRi 50mg/kg PO daily         |

**Supplemental Figure 10. Animal weights by treatment group.** Weight (grams) of mice treated with vehicle (control), carboplatin, PARPi, CHK1i or ATRi for 6 weeks. All treatments were administered at the maximum tolerated doses. (Data is shown for experiment displayed in Figure 6C). The dot and whisker plot shows median, with box extending from the 25th to 75th percentile and the whiskers extending from minimum and maximum values of the data set. Control, n=9; PARPi n=16; Carboplatin, n=6; ATRi, n=9; CHK1i, n=8.

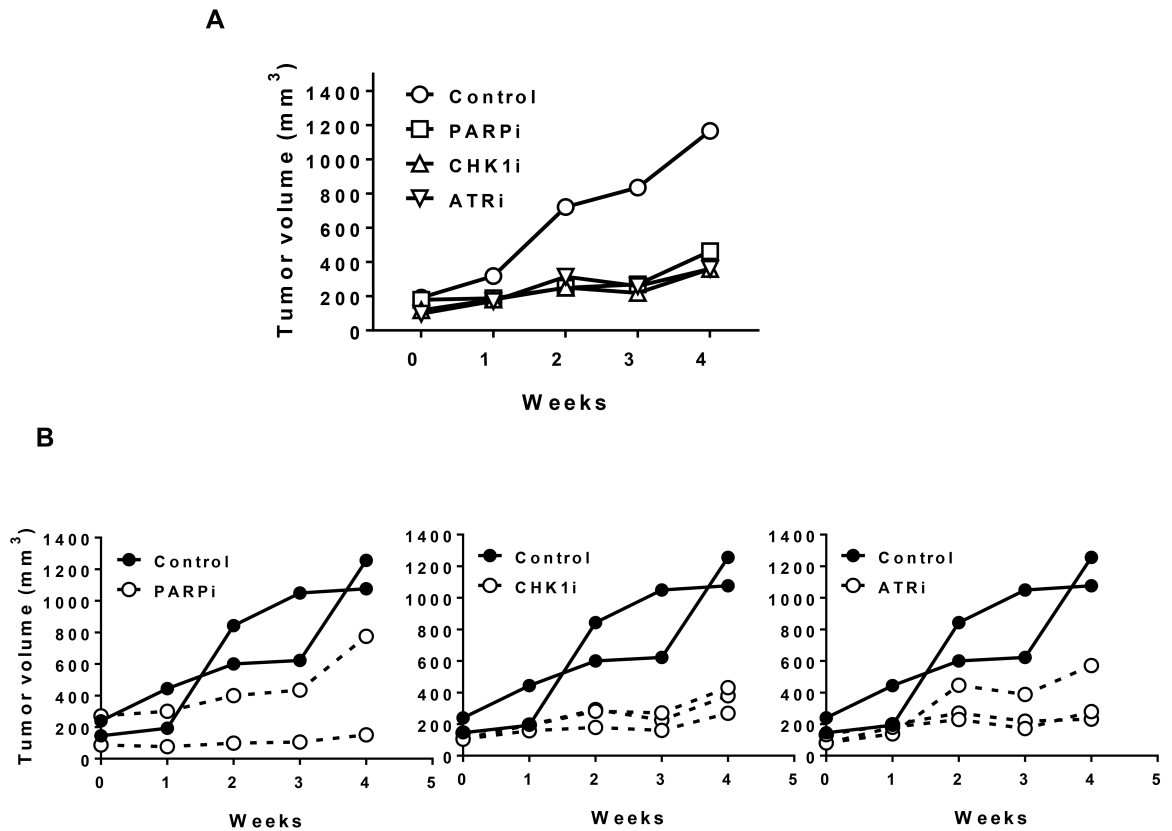

**Supplemental Figure 11. Targeting the ATR-CHK1 axis in a BRCA1 mutant PDX model (WO21-1).** (A) WO-21-1 PDXs were randomized into the following groups: vehicle control, PARPi (AZD2281) 100mg/kg by oral gavage daily, CHK1i (MK8776) 50mg/kg intraperitoneally every 3 days, and ATRi (AZD6738) 50mg/kg daily. Tumor volume was measured by weekly ultrasound. Each symbol represents mean of 2-3 determinations. (B) Tumor volume plotted over treatment duration for individual PDXs.

Each dot represents tumor volume of individual mouse. Control, n=2; PARPi n=2; ATRi, n=3; CHK1i, n=3.
